# Supplementary material
Source: PubMed Central journal article supplement (PMC11060334)
Supplement: NIHMS1915461-supplement-Supplementary_material.pdf [file NIHMS1915461-supplement-Supplementary_material.pdf]

Vacuum Insulated Probe Heated ElectroSpray Ionization source (VIP-HESI) enhances micro flow rate chromatography signals in the Bruker timsTOF mass spectrometer

Mukul K. Midha<sup>1</sup>, Charu Kapil<sup>1</sup>, Michal Maes<sup>1</sup>, David H. Baxter<sup>1</sup>, Seamus R. Morrone<sup>1</sup>, Timothy J. Prokop<sup>1</sup>, and Robert L. Moritz<sup>1\*</sup>

<sup>1</sup>Institute for Systems Biology, 401 Terry Ave N, Seattle, WA, 98109, USA

\*Address correspondence to Robert Moritz: Email: [rmoritz@systemsbiology.org](mailto:rmoritz@systemsbiology.org), Phone: 206-732-1200, Fax: 206-732-1299.

## Table of Contents

|                                                                                                                                                            |            |
|------------------------------------------------------------------------------------------------------------------------------------------------------------|------------|
| <b>Supplementary Figure 1. Bar graph of peak areas of individual 20 PepCalMix peptides to assess linearity measured at different sample amounts.....</b>   | <b>S1</b>  |
| <b>Supplementary Figure 2. Performance assessment of VIP-HESI and CS ion sources using mouse plasma samples. ....</b>                                      | <b>S2</b>  |
| <b>Supplementary Figure 3. Estimation of MS instrument variation across the 891 VIP-HESI injections using K562 QC samples. ....</b>                        | <b>S3</b>  |
| <b>Supplementary Table 1. Metadata of the mouse liver, kidney, gastrocnemius muscle tissues, and plasma samples.....</b>                                   | <b>S4</b>  |
| <b>Supplementary Table 2. Acquisition and LC separation details used in this study.....</b>                                                                | <b>S4</b>  |
| <b>Supplementary Table 3. DIALib-QC report of spectral assay libraries "HeLa_timsTOF_DDA_DIA_Library" and "Mouse_tissue_plasma_DDA_DIA_Library"</b>        | <b>S6</b>  |
| <b>Supplementary Table 4. Performance of ESI and VIP-HESI sources with different sample amounts of PepCalMix peptides.....</b>                             | <b>S7</b>  |
| <b>Supplementary Table 5. Comparative performance of the VIP-HESI and CS ion sources using mouse plasma sample by dia-PASEF analysis.....</b>              | <b>S10</b> |
| <b>Supplementary Table 6. Quantitative analysis of hundreds of plasma proteomes by VIP-HESI source coupled with micro-flow liquid chromatography.....</b>  | <b>S10</b> |
| <b>Supplementary Table 7. Assessment of MS instrument variation across the 891 VIP-HESI injections using K562 QC samples analyzed by Spectronaut. ....</b> | <b>S10</b> |
| <b>Supplementary Table 8. Comparative performance of VIP-HESI microflow setup using Slice-PASEF and dia-PASEF modes.....</b>                               | <b>S10</b> |

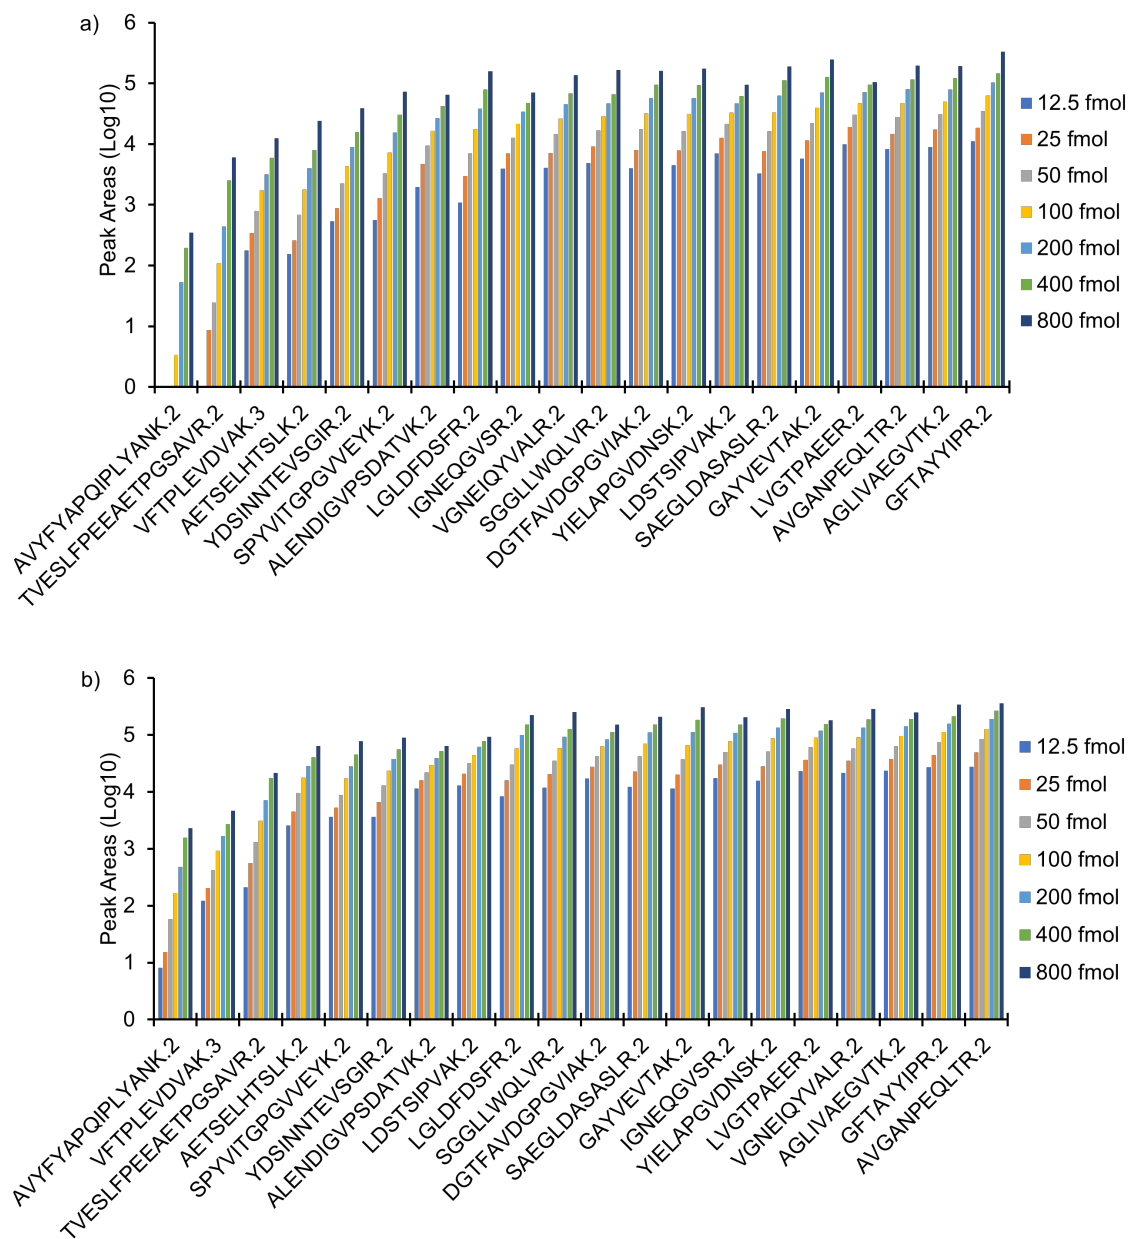

**Supplementary Figure 1. Bar graph of peak areas of individual 20 PepCalMix peptides to assess linearity measured at different sample amounts. a) ESI source, b) VIP-HESI source.** In the ESI source measurements, AVYFYAPQIPLYANK.2 peptide ion was not detected in 12.5 fmol, 25 fmol, and 50 fmol samples, and TVESLFPPEEAETPGSAVR.2 peptide ion was not detected in the 12.5 fmol sample. However, using the VIP-HESI source, all 20 PepCalMix peptides were detected for all sample amounts.

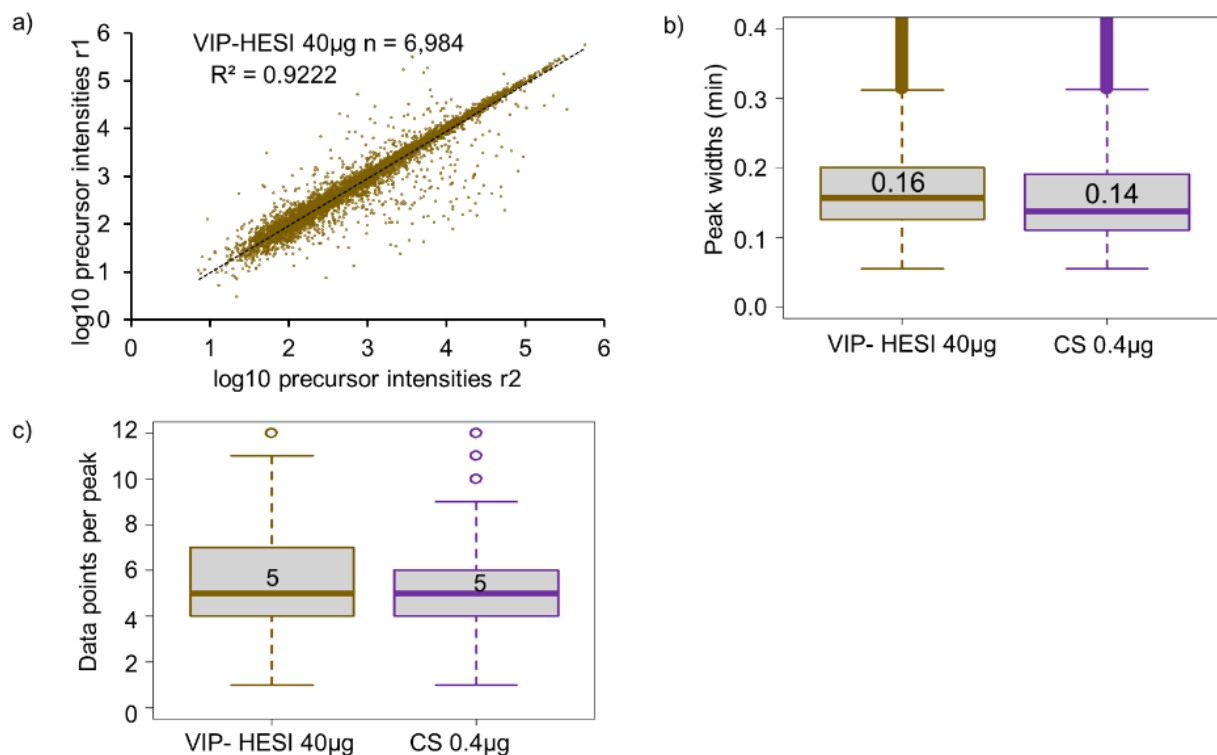

**Supplementary Figure 2. Performance assessment of VIP-HESI and CS ion sources using mouse plasma samples.** **a)** Pearson correlation of precursor intensity values obtained from 6,984 precursors that were quantified in both replicates using VIP-HESI 0.4 µg measurements of mouse plasma samples. **b)** Distribution of the base peak widths of precursors identified for VIP-HESI 40 µg and CS 0.4 µg measurements estimated by Spectronaut. A median value of 0.16 (9.6s) and 0.14 (8.4s) peak widths were observed for VIP-HESI 40 µg and CS 0.4 µg injections, respectively. **c)** Distribution of data points per elution peak for the VIP-HESI 40 µg and CS 0.4 µg measurements estimated by Spectronaut.

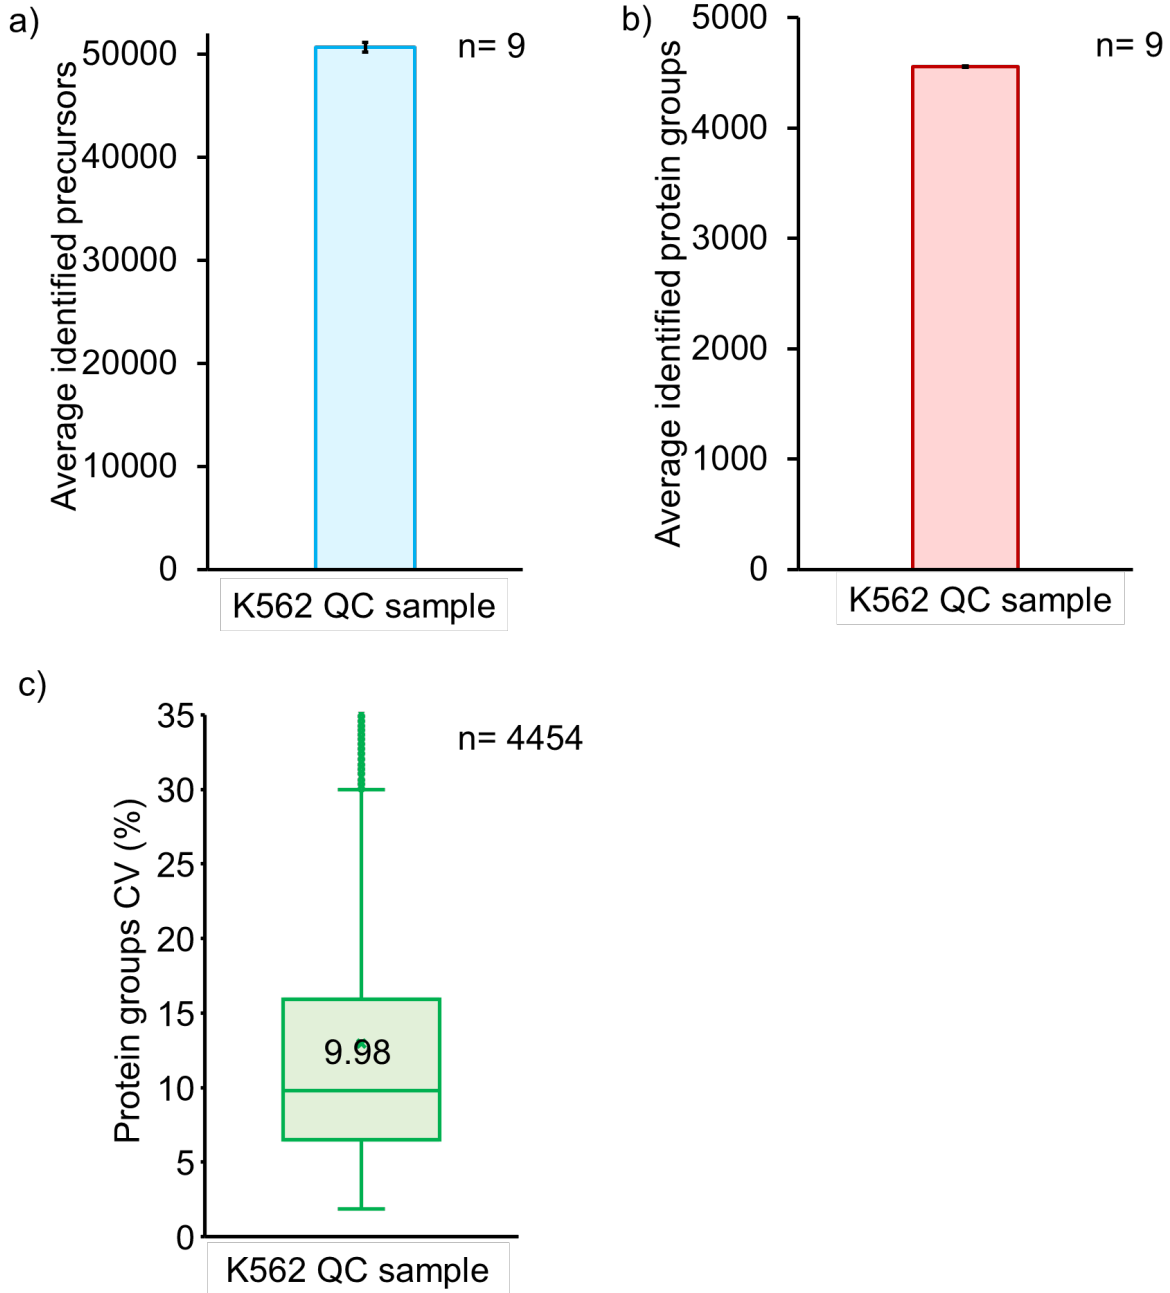

**Supplementary Figure 3. Estimation of MS instrument variation across the 891 VIP-HESI injections using K562 QC samples.** The average **a)** number of precursors and **b)** protein groups identified with nine technical replicates. **c)** Distribution of coefficient of variation (CV) proteins identified in all nine replicates at 1% protein FDR estimated by Spectronaut. The median CV of 10% correlates well with the signal stability achieved using the VIP-HESI source setup. The first and third quartile are marked by a box with a whisker marking a minimum/maximum value ranging to 10 interquartile and the median is depicted as a solid line.

## Supplementary Table 1. Metadata of the mouse liver, kidney, gastrocnemius muscle tissues, and plasma samples.

Available via ProteomeXchange (PXD040497).

## Supplementary Table 2. Acquisition and LC separation details used in this study.

| S.No | Samples                                | Ion source used   | LC gradient used (min) | LC used                   | Analytical column used                                                                                                                                                                                                                                      | Flow rate         | Injected amount                     | DIA mode    | DIA tool    | Number of raw folders (.d) | Name of folder                 |
|------|----------------------------------------|-------------------|------------------------|---------------------------|-------------------------------------------------------------------------------------------------------------------------------------------------------------------------------------------------------------------------------------------------------------|-------------------|-------------------------------------|-------------|-------------|----------------------------|--------------------------------|
| 1    | PepCalMix                              | ESI, CS, VIP-HESI | 45                     | EasyLC nano, Vanquish Neo | C18, 15cm x 1mm x 1.7µm Kinetix column (Phenomenex), C18 UHP 15cm x 0.15mm x 1.5µm column (Bruker/PepSep)                                                                                                                                                   | 40µL/min, 1µL/min | 12.5, 25, 50, 100, 200, 400, 800 fm | dia-pasef   | Spectronaut | 27                         | PepCalMix-CS-ESI-VIP-HESI.zip  |
| 2    | Mouse Plasma control                   | CS, VIP-HESI      | 45                     | Vanquish Neo              | C18, 15cm x 1mm x 1.7µm Kinetix column (Phenomenex), C18 UHP 15cm x 0.15mm x 1.5µm column (Bruker/PepSep)                                                                                                                                                   | 40µL/min, 1µL/min | 0.4, 2, 4, 10, 20, 40 µg            | dia-pasef   | Spectronaut | 12                         | Mouse-Plasma-CS-VIP-HESI.zip   |
| 3    | Mouse Plasma                           | VIP-HESI          | 45                     | Vanquish Neo              | C18, 15cm x 1mm x 1.7µm Kinetix column (Phenomenex)                                                                                                                                                                                                         | 40µL/min          | 20 µg                               | dia-pasef   | Spectronaut | 284                        | Mouse-Plasma-284-VIP-HESI.zip  |
| 4    | Mouse Liver                            | CS                | 30SPD                  | EvoSep One                | C18, 25cm x 0.2mm x 1.5µm column (Bruker/PepSep)                                                                                                                                                                                                            | 0.5µL/min         | 200 ng                              | dia-pasef   | Spectronaut | 291                        | Mouse-Liver-CS-291.zip         |
| 5    | Mouse Kidney                           | CS                | 30SPD                  | EvoSep One                | C18, 25cm x 0.2mm x 1.5µm column (Bruker/PepSep)                                                                                                                                                                                                            | 0.5µL/min         | 200 ng                              | dia-pasef   | Spectronaut | 290                        | Mouse-Kidney-CS-290.zip        |
| 6    | Mouse Gastrocnemius muscle             | CS                | 30SPD                  | EvoSep One                | C18, 25cm x 0.2mm x 1.5µm column (Bruker/PepSep)                                                                                                                                                                                                            | 0.5µL/min         | 200 ng                              | dia-pasef   | Spectronaut | 290                        | Mouse-GastrocMuscle-CS-290.zip |
| 7    | K562                                   | VIP-HESI          | 21                     | Vanquish Neo              | C18, 15cm x 1mm x 1.7µm Kinetix column (Phenomenex)                                                                                                                                                                                                         | 40µL/min          | 2 µg                                | dia-pasef   | Spectronaut | 9                          | K562-VIP-HESI.zip              |
| 8    | HeLa                                   | VIP-HESI          | 21                     | Vanquish Neo              | C18, 20cm x 0.5mm x 1.9µm column (Dr. Maisch GmbH)                                                                                                                                                                                                          | 20µL/min          | 10, 100, 1000 ng                    | slice-pasef | DIA-NN      | 18                         | HeLa-VIP-HESI.zip              |
| 9    | HeLa (for spectral library generation) | CS                | 90                     | Nano Elute                | C18, 25cm x 0.075mm x 1.6µm column (IonOptiks)                                                                                                                                                                                                              | 0.40 µL/min       | 35µg                                | dda-pasef   | Spectronaut | 24                         | HeLa-Library-CS.zip            |
|      |                                        |                   | 90                     | EasyLC nano               | C18, 25cm x 0.075mm x 1.6µm column (IonOptiks)                                                                                                                                                                                                              | 0.40 µL/min       | 200 ng                              | dia-pasef   | Spectronaut | 2                          |                                |
|      |                                        |                   | 88                     | EasyLC nano               | C18, 40cm x 0.075mm x 1.9µm column (Bruker/PepSep)                                                                                                                                                                                                          | 0.30 µL/min       | 200 ng                              | dia-pasef   | Spectronaut | 4                          |                                |
|      |                                        |                   | 200SPD                 | EvoSep One                | C18, 8cm x 0.15mm x 1.5µm column (Bruker/PepSep)                                                                                                                                                                                                            | 2µL/min           | 200 ng                              | dia-pasef   | Spectronaut | 3                          |                                |
|      |                                        |                   | 100SPD                 | EvoSep One                | C18, 8cm x 0.15mm x 1.5µm column (Bruker/PepSep), C18, 15cm x 0.15mm x 1.5µm column (Bruker/PepSep), C18, 15cm x 0.15mm x 1.9µm column (Bruker/PepSep), C18, 25cm x 0.2mm x 1.5µm column (Bruker/PepSep), C18, 25cm x 0.15mm x 1.9µm column (Bruker/PepSep) | 1.5µL/min         | 200 ng                              | dia-pasef   | Spectronaut | 15                         |                                |
|      |                                        |                   | 60SPD                  | EvoSep One                | C18, 8cm x 0.15mm x 1.5µm column (Bruker/PepSep), C18, 15cm x 0.15mm x 1.5µm column (Bruker/PepSep), C18, 15cm x 0.15mm x 1.9µm column (Bruker/PepSep), C18, 25cm x 0.2mm x 1.5µm column (Bruker/PepSep), C18, 25cm x 0.15mm x 1.9µm column (Bruker/PepSep) | 1µL/min           | 200 ng                              | dia-pasef   | Spectronaut | 15                         |                                |
|      |                                        |                   | 30SPD                  | EvoSep One                | C18, 8cm x 0.15mm x 1.5µm column (Bruker/PepSep), C18, 15cm x 0.15mm x 1.5µm column (Bruker/PepSep), C18, 15cm x 0.15mm x 1.9µm column (Bruker/PepSep), C18, 25cm x 0.2mm x 1.5µm column (Bruker/PepSep), C18, 25cm x 0.15mm x 1.9µm column (Bruker/PepSep) | 0.5µL/min         | 200 ng                              | dia-pasef   | Spectronaut | 15                         |                                |
|      |                                        |                   | 15SPD                  | EvoSep One                | C18, 15cm x 0.15mm x 1.5µm column (Bruker/PepSep), C18, 15cm x 0.15mm x 1.9µm column (Bruker/PepSep), C18, 25cm x 0.2mm x 1.5µm column (Bruker/PepSep), C18, 25cm x 0.15mm x 1.9µm column (Bruker/PepSep)                                                   | 0.22µL/min        | 200 ng                              | dia-pasef   | Spectronaut | 16                         |                                |

| <b>LC Separation details</b>       |           |           |
|------------------------------------|-----------|-----------|
| <b>Stepwise 45-minute gradient</b> |           |           |
| <b>Time (min)</b>                  | <b>%A</b> | <b>%B</b> |
| 0                                  | 99        | 1         |
| 1                                  | 97        | 3         |
| 37                                 | 75        | 25        |
| 45                                 | 65        | 35        |
| 46                                 | 20        | 80        |
| 48                                 | 20        | 80        |
| <b>Linear 21-minute gradient</b>   |           |           |
| <b>Time (min)</b>                  | <b>%A</b> | <b>%B</b> |
| 0                                  | 99        | 1         |
| 3                                  | 97        | 3         |
| 21                                 | 65        | 35        |
| 22                                 | 20        | 80        |
| 24                                 | 20        | 80        |
| <b>Linear 90-minute gradient</b>   |           |           |
| <b>Time (min)</b>                  | <b>%A</b> | <b>%B</b> |
| 0                                  | 95        | 5         |
| 90                                 | 65        | 35        |
| 110                                | 20        | 95        |
| 120                                | 20        | 95        |
| 121                                | 97        | 5         |
| 130                                | 97        | 5         |

**Supplementary Table 3. DIALib-QC report of spectral assay libraries  
"HeLa\_timsTOF\_DDA\_DIA\_Library" and "Mouse\_tissue\_plasma\_DDA\_DIA\_Library"**

| DIALib-QC parameters     | HeLa_timsTOF_DDA_DIA_Library | Mouse_tissue_plasma_DDA_DIA_Library | Parameter definitions                                                                                                      |
|--------------------------|------------------------------|-------------------------------------|----------------------------------------------------------------------------------------------------------------------------|
| format                   | Spectronaut                  | Spectronaut                         | Library format, one of OpenSWATH, Peakview, or Spectronaut                                                                 |
| peptions                 | 226138                       | 468099                              | Number of peptide ions (i.e. precursor, sequence + modifications + charge)                                                 |
| fragments                | 4299713                      | 9163950                             | Number of fragment (fragment ions) in library                                                                              |
| ptp_percent              | 100                          | 100                                 | Percentage of proteotypic pepions (not shared)                                                                             |
| shared_percent           | 0                            | 0                                   | Percentage of shared peptide ions (peptions)                                                                               |
| shared_peptions          | 0                            | 0                                   | Number of shared pepions                                                                                                   |
| peptides                 | 160917                       | 180681                              | Number of distinct peptide sequences                                                                                       |
| mod_peps                 | 180516                       | 335758                              | Number of distinct modified peptides (sequences + modifications)                                                           |
| mod_percent              | 30.9                         | 58.6                                | percentage of distinct modified peptides with a mass modification                                                          |
| total_mods               | 71605                        | 349020                              | Number of mass modified amino acids                                                                                        |
| chg_2                    | 57                           | 26.2                                | Percentage of charge 2 precursors                                                                                          |
| chg_3                    | 34.1                         | 39.8                                | Percentage of charge 3 precursors                                                                                          |
| precursor_min            | 312.9                        | 306.2                               | Minimum precursor m/z (mass/charge) in library                                                                             |
| precursor_max            | 1673.8                       | 1692.9                              | Maximum precursor m/z in library                                                                                           |
| fragment_min             | 199.1                        | 199.1                               | Minimum fragment m/z in library                                                                                            |
| fragment_max             | 1700                         | 1699.9                              | Maximum fragment m/z in library                                                                                            |
| avg_len                  | 15.4                         | 17.7                                | Average peptide Length                                                                                                     |
| avg_num_frags            | 19.01                        | 19.58                               | Average number of fragment per assay (precursor)                                                                           |
| avg_frag_len             | 1.23                         | 1.11                                | Average fragment sequence length                                                                                           |
| short_perc               | 100                          | 100                                 | Percentage of assays with 5 or fewer transitions                                                                           |
| fragment_above_precursor | 0.462                        | 0.58                                | Percentage of fragment m/z above precursor m/z                                                                             |
| y_perc                   | 61.2                         | 62.7                                | Percentage of y ions                                                                                                       |
| b_perc                   | 38.8                         | 37.3                                | Percentage of b ions                                                                                                       |
| t6_y_perc                | 59.6                         | 63.8                                | Percentage of y ions considering only the top 6 fragments per assay                                                        |
| avg_intensity            | 0                            | 0                                   | Average Intensity                                                                                                          |
| rt_min                   | -91                          | -1953.7                             | Minimum RT (retention time) in library                                                                                     |
| rt_max                   | 368.9                        | 404.5                               | Maximum RT in library                                                                                                      |
| rt_med                   | 36.1                         | 40.4                                | Median RT in library                                                                                                       |
| rt_rsqr                  | 1                            | 1                                   | r-squared value of fit between RT of +2 and +3 charge states for the same modified peptide                                 |
| rt_five                  | 100                          | 100                                 | Percentage of +2/+3 charge pairs of the same mod pep within 5 RT units of each other                                       |
| n_irt                    | 11                           | 11                                  | Number of iRT peptides in library                                                                                          |
| irt_cnt                  | 301                          | 582                                 | Number of iRT assays (precursor + fragment)                                                                                |
| low_nr                   | 0                            | 0                                   | Number of fragment annotated as y1,y2,b1, or b2                                                                            |
| db_peps                  | 0                            | 0                                   | Peptides in reference library, often 7-50 AA                                                                               |
| seen_peps                | 0                            | 0                                   | Number of library peptides seen                                                                                            |
| mc_peps                  | 27571                        | 70416                               | Number of Missed cleavage peptides                                                                                         |
| db_prots                 | 0                            | 0                                   | Number of Proteins in reference library                                                                                    |
| lib_prots                | 10258                        | 10530                               | Number of proteins with at least one assay in ion library                                                                  |
| seen_prots               | N/A                          | N/A                                 | Number of library proteins seen                                                                                            |
| ux_prots                 | N/A                          | N/A                                 | Unexplained (not in reference library) proteins                                                                            |
| decoy_pct                | 0                            | 0                                   | Percentage of decoy (optionally includes "alternative", non-db decoys) assays                                              |
| mixed_pct                | 0                            | 0                                   | Percentage of mixed decoy/target (has both decoy and no-decoy annotations) assays                                          |
| fwd_pct                  | 100                          | 100                                 | Percentage of target (non-decoy) assays                                                                                    |
| med_ppp                  | 14                           | 20                                  | Median number of pepions per protein                                                                                       |
| mean_ppp                 | 22                           | 44.5                                | Mean number of pepions per protein                                                                                         |
| stddev_ppp               | 28.8                         | 102.1                               | Standard deviation of the number of pepions per protein                                                                    |
| 3_sigma_ppp              | 143                          | 103                                 | number of pepions per protein more than 3 standard deviations from the mean                                                |
| max_intensity_idx        | 1                            | 1                                   | Average index of most intense fragment                                                                                     |
| precursor_ok             | 226138                       | 468099                              | Number of assays where precursor is within 5 PPM (parts per million m/z) of theoretical                                    |
| precursor_bad            | 0                            | 0                                   | Number of assays where precursor is more than 5 PPM from theoretical                                                       |
| fragment_ok              | 4299713                      | 9163950                             | Number of assays where fragment is within 1 PPM of theoretical                                                             |
| fragment_bad             | 0                            | 0                                   | Number of assays where fragment is more than 1 PPM from theoretical                                                        |
| fragment_na              | 0                            | 0                                   | Number of assays where peak annotation not found in expected b/y series                                                    |
| fragment_avg_mdif        | 0                            | 0                                   | Average m/z difference between reported and theoretical fragment                                                           |
| problem_assays           | 0                            | 0                                   | Assays whose precursor or any fragment m/z values do not match SWATHs file or differ significantly from theoretical values |
| im_min                   | 0.677                        | 0.5757                              | Minimum ion mobility reported in library                                                                                   |
| im_max                   | 1.558                        | 1.544                               | Maximum ion mobility reported in library                                                                                   |

**Supplementary Table 4. Performance of ESI and VIP-HESI sources with different sample amounts of PepCalMix peptides.** **a)** Assessing linearity using total abundance of 20 PepCalMix peptides detected in three replicates at seven different sample amounts using ESI and VIP-HESI sources. **b)** Linearity assessment of ESI and VIP-HESI source using individual PepCalMix peptides across eight injected sample amounts. **c)** Sensitivity gains in abundance of 20 PepCalMix peptides using VIP-HESI compared to ESI source at different sample amounts. Fold change was estimated by taking the ratio of average abundance for each PepCalMix peptide at seven sample amounts. The gradient of colors in the visualization denotes the degree of change in fold increase to decrease. Dark green denotes higher gains, light blue indicates lower gains, and dark blue indicates no observed gains with VIP-HESI. NA represents missing abundance values in ESI source. **d)** Impact of different flow rates on the PepCalMix peptides abundances using ESI and VIP-HESI sources. **e)** Comparative performance of VIP-HESI with standard ESI and CS ion sources using 20 synthetic PepCalMix peptides.

a)

| Sample amounts | ESI PepCalMix peptides abundances | VIP-HESI PepCalMix peptides abundances |
|----------------|-----------------------------------|----------------------------------------|
| 12.5fmol.R1    | 2813.87                           | 6302.291                               |
| 12.5fmol.R2    | 2859.867                          | 6424.048                               |
| 12.5fmol.R3    | 2688.512                          | 5869.221                               |
| 25fmol.R1      | 5267.807                          | 10959.11                               |
| 25fmol.R2      | 5132.729                          | 10284.6                                |
| 25fmol.R3      | 5270.54                           | 10376.88                               |
| 50fmol.R1      | 10550.43                          | 19400.86                               |
| 50fmol.R2      | 10496.75                          | 19092.57                               |
| 50fmol.R3      | 10654.36                          | 20386.2                                |
| 100fmol.R1     | 20136.4                           | 35183.6                                |
| 100fmol.R2     | 19370.99                          | 35694.14                               |
| 100fmol.R3     | 19873.7                           | 35103.41                               |
| 200fmol.R1     | 36960.71                          | 61478.5                                |
| 200fmol.R2     | 36136.28                          | 61519.64                               |
| 200fmol.R3     | 34841.57                          | 59875.65                               |
| 400fmol.R1     | 63625.14                          | 94031.12                               |
| 400fmol.R2     | 62723.77                          | 95216.07                               |
| 400fmol.R3     | 63719.58                          | 94905.24                               |
| 800fmol.R1     | 129383.9                          | 153838.7                               |
| 800fmol.R2     | 129319.1                          | 158268.3                               |
| 800fmol.R3     | 132619.8                          | 155157.8                               |



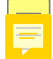

b)

| PepCalMix 20 peptide ions | ESI R <sup>2</sup> | VIP-HESI R <sup>2</sup> |
|---------------------------|--------------------|-------------------------|
| AVYFYAPQIPLYANK.2         | 0.905              | 0.989                   |
| TVESLFPPEEAETPGSAVR.2     | 0.994              | 0.986                   |
| VFTPLEVDVAK.3             | 0.998              | 0.994                   |
| AETSELHTSLK.2             | 0.995              | 0.986                   |
| YDSINNTEVSGIR.2           | 0.996              | 0.991                   |
| SPYVITGPGVVEYK.2          | 0.998              | 0.997                   |
| ALENDIGVPSDATVK.2         | 0.982              | 0.996                   |
| LGLDFDSFR.2               | 0.996              | 0.990                   |
| IGNEQGVSR.2               | 0.989              | 0.987                   |
| VGNEIQYVALR.2             | 0.996              | 0.995                   |
| SGLLWQLVR.2               | 0.991              | 0.995                   |
| DGTFAVDGGPGVIAK.2         | 0.993              | 0.990                   |
| YIELAPGVDNSK.2            | 0.998              | 0.990                   |
| LDSTSIPVAK.2              | 0.985              | 0.977                   |
| SAEGLDASASLR.2            | 0.994              | 0.982                   |
| GAYVEVTAK.2               | 0.999              | 0.999                   |
| LVGTPAEER.2               | 0.963              | 0.969                   |
| AVGANPEQLTR.2             | 0.995              | 0.986                   |
| AGLIVAEGVTK.2             | 0.994              | 0.987                   |
| GFTAYYIPR.2               | 0.993              | 0.993                   |

c)

| PepCalMix 20 peptide ions | 12.5fmol | 25fmol | 50fmol | 100fmol | 200fmol | 400fmol | 800fmol |
|---------------------------|----------|--------|--------|---------|---------|---------|---------|
| AETSELHTSLK.2             | 16.5     | 17.3   | 14.1   | 9.9     | 7.1     | 5.1     | 2.7     |
| AGLIVAEGVTK.2             | 2.6      | 2.2    | 2.1    | 1.9     | 1.8     | 1.6     | 1.3     |
| ALENDIGVPSDATVK.2         | 5.9      | 3.4    | 2.3    | 1.8     | 1.5     | 1.2     | 1.0     |
| AVGANPEQLTR.2             | 3.3      | 3.3    | 3.0    | 2.7     | 2.4     | 2.3     | 1.9     |
| AVYFYAPQIPLYANK.2         | NA       | NA     | NA     | 49.7    | 9.1     | 8.0     | 6.7     |
| DGTFAVDGGPGVIAK.2         | 4.3      | 3.5    | 2.4    | 2.0     | 1.5     | 1.2     | 1.0     |
| GAYVEVTAK.2               | 2.0      | 1.7    | 1.7    | 1.7     | 1.6     | 1.5     | 1.3     |
| GFTAYYIPR.2               | 2.5      | 2.4    | 2.1    | 1.8     | 1.5     | 1.5     | 1.0     |
| IGNEQGVSR.2               | 4.5      | 4.3    | 3.9    | 3.6     | 3.2     | 3.2     | 2.9     |
| LDSTSIPVAK.2              | 1.9      | 1.7    | 1.5    | 1.3     | 1.3     | 1.2     | 1.0     |
| LGLDFDSFR.2               | 7.7      | 5.4    | 4.3    | 3.3     | 2.6     | 1.9     | 1.4     |
| LVGTPAEER.2               | 2.3      | 1.9    | 2.0    | 1.9     | 1.7     | 1.6     | 1.7     |
| SAEGLDASASLR.2            | 3.7      | 3.0    | 2.6    | 2.1     | 1.8     | 1.4     | 1.1     |
| SGLLWQLVR.2               | 2.4      | 2.3    | 2.1    | 2.1     | 2.0     | 2.0     | 1.5     |
| SPYVITGPGVVEYK.2          | 6.5      | 4.1    | 2.7    | 2.4     | 1.8     | 1.5     | 1.1     |
| TVESLFPPEEAETPGSAVR.2     | NA       | 64.8   | 54.1   | 28.8    | 16.2    | 7.0     | 3.6     |
| VFTPLEVDVAK.3             | 0.7      | 0.6    | 0.5    | 0.5     | 0.5     | 0.4     | 0.4     |
| VGNEIQYVALR.2             | 5.3      | 4.9    | 4.0    | 3.5     | 3.0     | 2.8     | 2.1     |
| YDSINNTEVSGIR.2           | 6.8      | 7.5    | 5.7    | 5.4     | 4.2     | 3.6     | 2.3     |
| YIELAPGVDNSK.2            | 3.5      | 3.6    | 3.1    | 2.8     | 2.4     | 2.1     | 1.6     |

d)

| Flow rates    | Total abundance of 20 PepCalMix peptides |                  |
|---------------|------------------------------------------|------------------|
|               | ESI-25 fmol                              | VIP-HESI-25 fmol |
| 5 $\mu$ L.R1  | 23370.6                                  | 19235.0          |
| 5 $\mu$ L.R2  | 23583.0                                  | 20407.6          |
| 5 $\mu$ L.R3  | 18964.4                                  | 20405.6          |
| 10 $\mu$ L.R1 | 14601.4                                  | 20411.7          |
| 10 $\mu$ L.R2 | 14665.6                                  | 20376.8          |
| 10 $\mu$ L.R3 | 12707.4                                  | 19992.0          |
| 20 $\mu$ L.R1 | 8566.8                                   | 14285.9          |
| 20 $\mu$ L.R2 | 8175.4                                   | 15095.8          |
| 20 $\mu$ L.R3 | 7331.2                                   | 13825.6          |
| 40 $\mu$ L.R1 | 6503.8                                   | 12155.6          |
| 40 $\mu$ L.R2 | 6898.8                                   | 12050.0          |
| 40 $\mu$ L.R3 | 6443.5                                   | 12877.4          |
| 80 $\mu$ L.R1 | 3445.8                                   | 7911.2           |
| 80 $\mu$ L.R2 | 3314.9                                   | 8510.0           |
| 80 $\mu$ L.R3 | 3234.9                                   | 8279.1           |

e)

| Sample amounts  | Total abundance of 20 PepCalMix peptides at 40 $\mu$ L/min |
|-----------------|------------------------------------------------------------|
| ESI-25fmol.R1   | 11409.95                                                   |
| ESI-25fmol.R2   | 11430.98                                                   |
| ESI-25fmol.R3   | 11326.41                                                   |
| CSI-25fmol.R1   | 149027.6                                                   |
| CSI-25fmol.R2   | 167811.5                                                   |
| CSI-25fmol.R3   | 156399                                                     |
| HESI-25fmol.R1  | 17558.73                                                   |
| HESI-25fmol.R2  | 16381.71                                                   |
| HESI-25fmol.R3  | 16760.01                                                   |
| HESI-800fmol.R1 | 189436                                                     |
| HESI-800fmol.R2 | 195298.2                                                   |
| HESI-800fmol.R3 | 197407.6                                                   |

**Supplementary Table 5. Comparative performance of the VIP-HESI and CS ion sources using mouse plasma sample by dia-PASEF analysis. a) VIP-HESI Mouse plasma measurements. b) CS Mouse plasma measurements.**

**Supplementary Table 6. Quantitative analysis of hundreds of plasma proteomes by VIP-HESI source coupled with micro-flow liquid chromatography. a) Mouse Plasma Precursor matrix. b) Mouse Plasma Protein matrix. c) Mouse Plasma RT-Chart Data.**

**Supplementary Table 7. Assessment of MS instrument variation across the 891 VIP-HESI injections using K562 QC samples analyzed by Spectronaut. a) Protein groups and b) Precursor sample matrices.**

**Supplementary Table 8. Comparative performance of VIP-HESI microflow setup using Slice-PASEF and dia-PASEF modes. a) dia-PASEF-10ng, b) dia-PASEF-100ng, c) dia-PASEF-1000ng, d) Slice-PASEF-10ng, e) Slice-PASEF-100ng, f) Slice-PASEF-1000ng.**

Supplementary Table 5-8 are available via ProteomeXchange (PXD040497).
